# Supplementary material for: Leaf water potential of coffee estimated by landsat-8 images
Source: PLoS One. 2020 Mar 18;15(3):e0230013. doi: 10.1371/journal.pone.0230013 (PMC7080268; doi:10.1371/journal.pone.0230013)
Supplement: S1 Data — (XLSX) [file pone.0230013.s001.xlsx]

## Sheet: Planilha1
Data PH	Ph	Municipality
2014-06-25	-0.3125	Lavras
2014-08-12	-1.0583	Lavras
2014-09-29	-2.4	Lavras
2014-12-18	-0.6	Lavras
2015-09-16	-0.733333	Lavras
2015-12-05	-0.25	Lavras
2016-08-05	-0.28125	Lavras
2016-09-15	-0.84	Lavras
2015-05-27	-0.281897	STA
2015-08-04	-0.944828	STA
2015-09-01	-0.660638	STA
2015-10-06	-0.973404	STA
2015-12-18	-0.25	STA
2016-03-03	-0.259	STA
2016-06-14	-0.261224	STA
2017-04-01	-0.20625	STA
2017-08-01	-0.75625	STA
2017-09-01	-0.76875	STA
2016-08-01	-0.28125	STA
2016-09-01	-0.8375	STA
